# Supplementary material
Source: PubMed Central journal article supplement (PMC1955783)

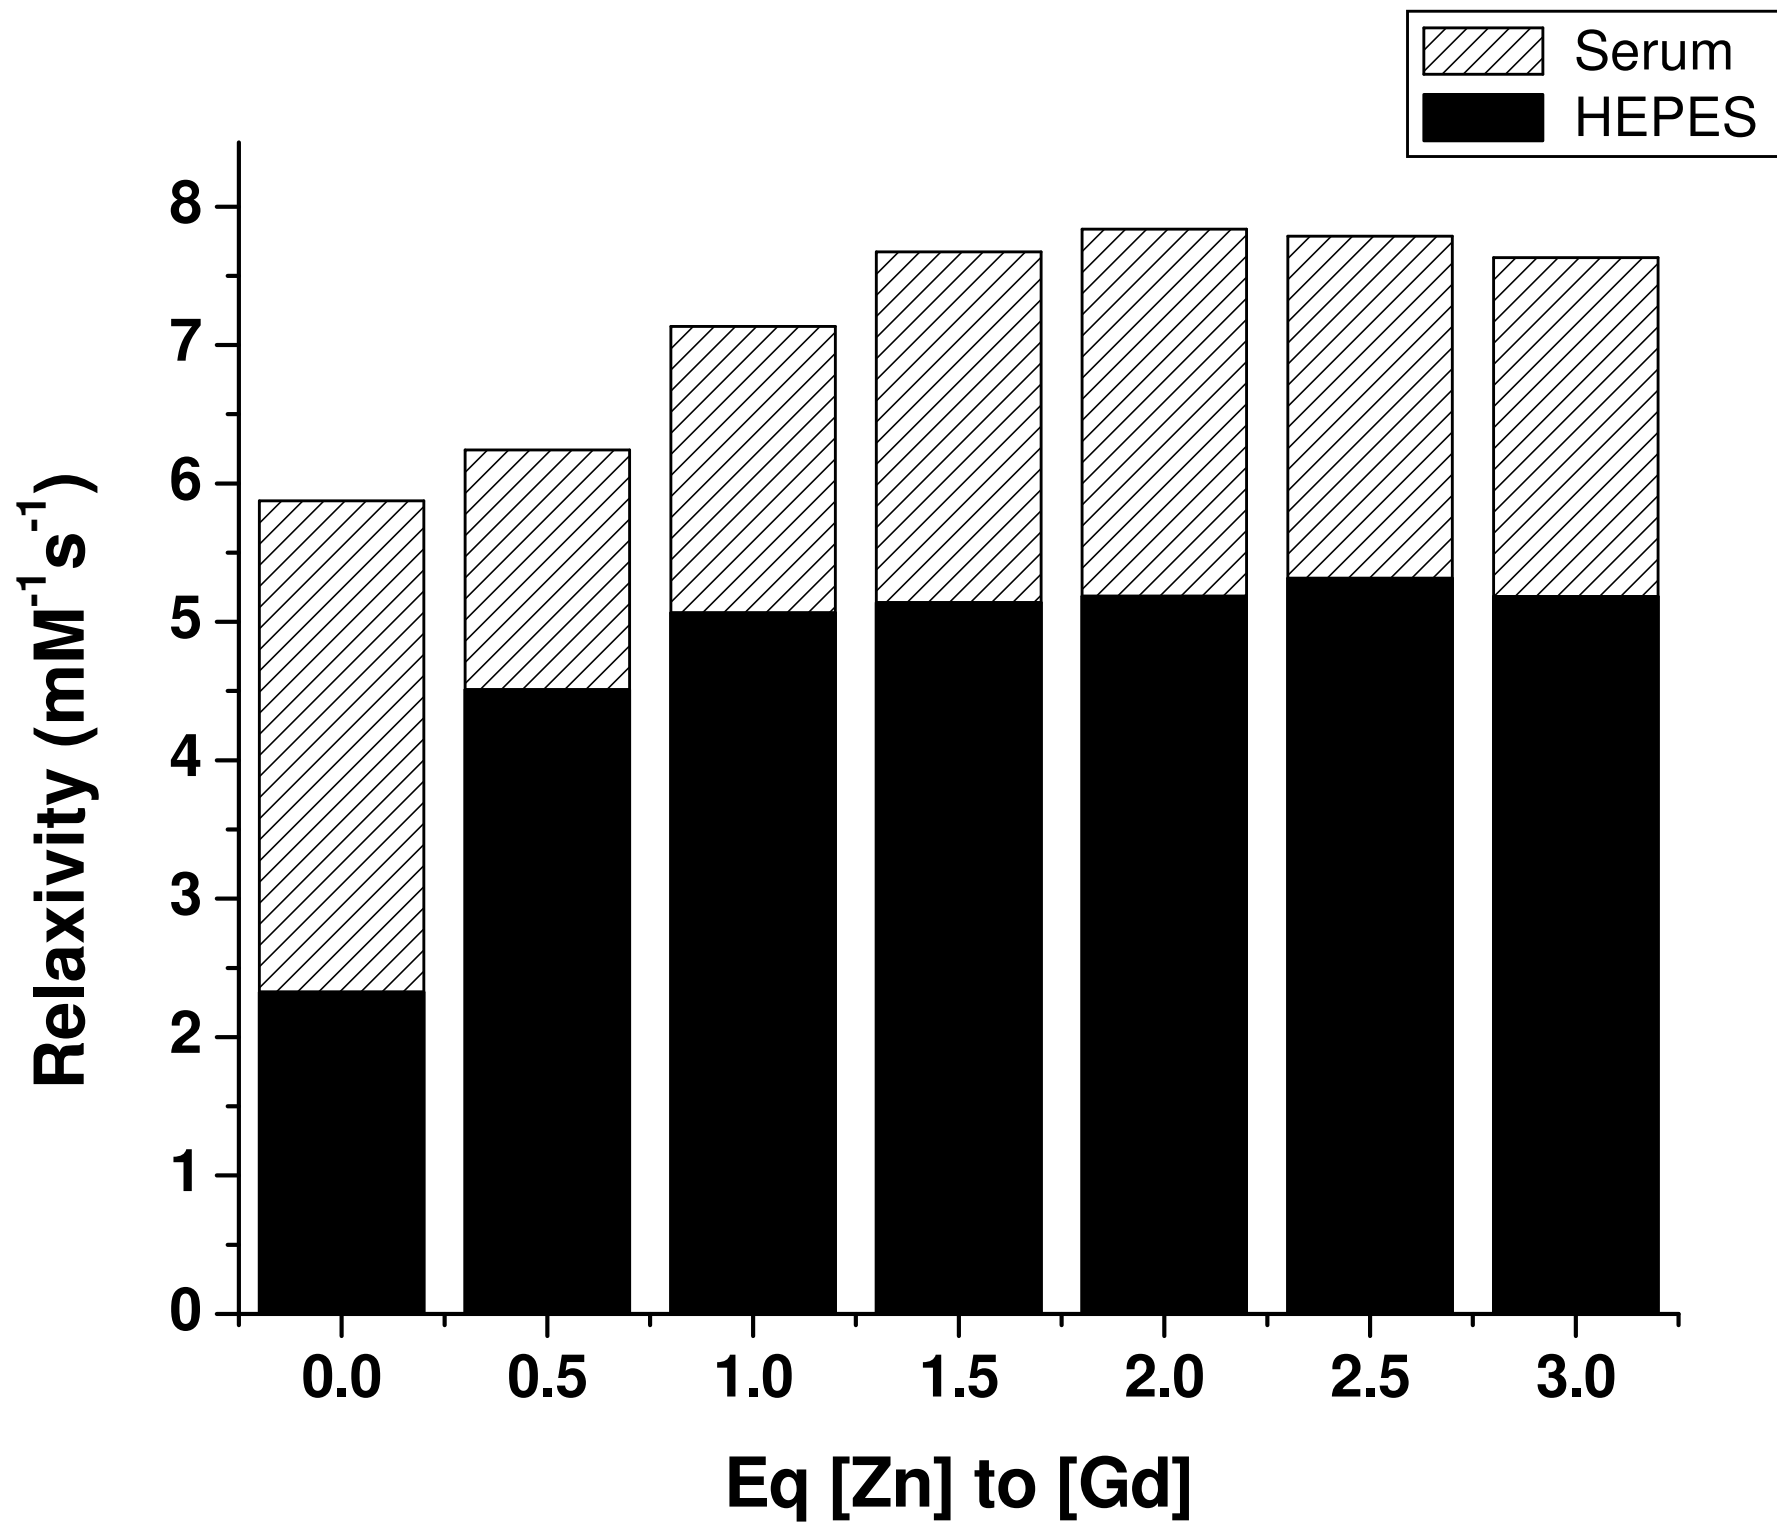

Supplement: pnas_0706247104_1.pdf [file pnas_0706247104_1.pdf]

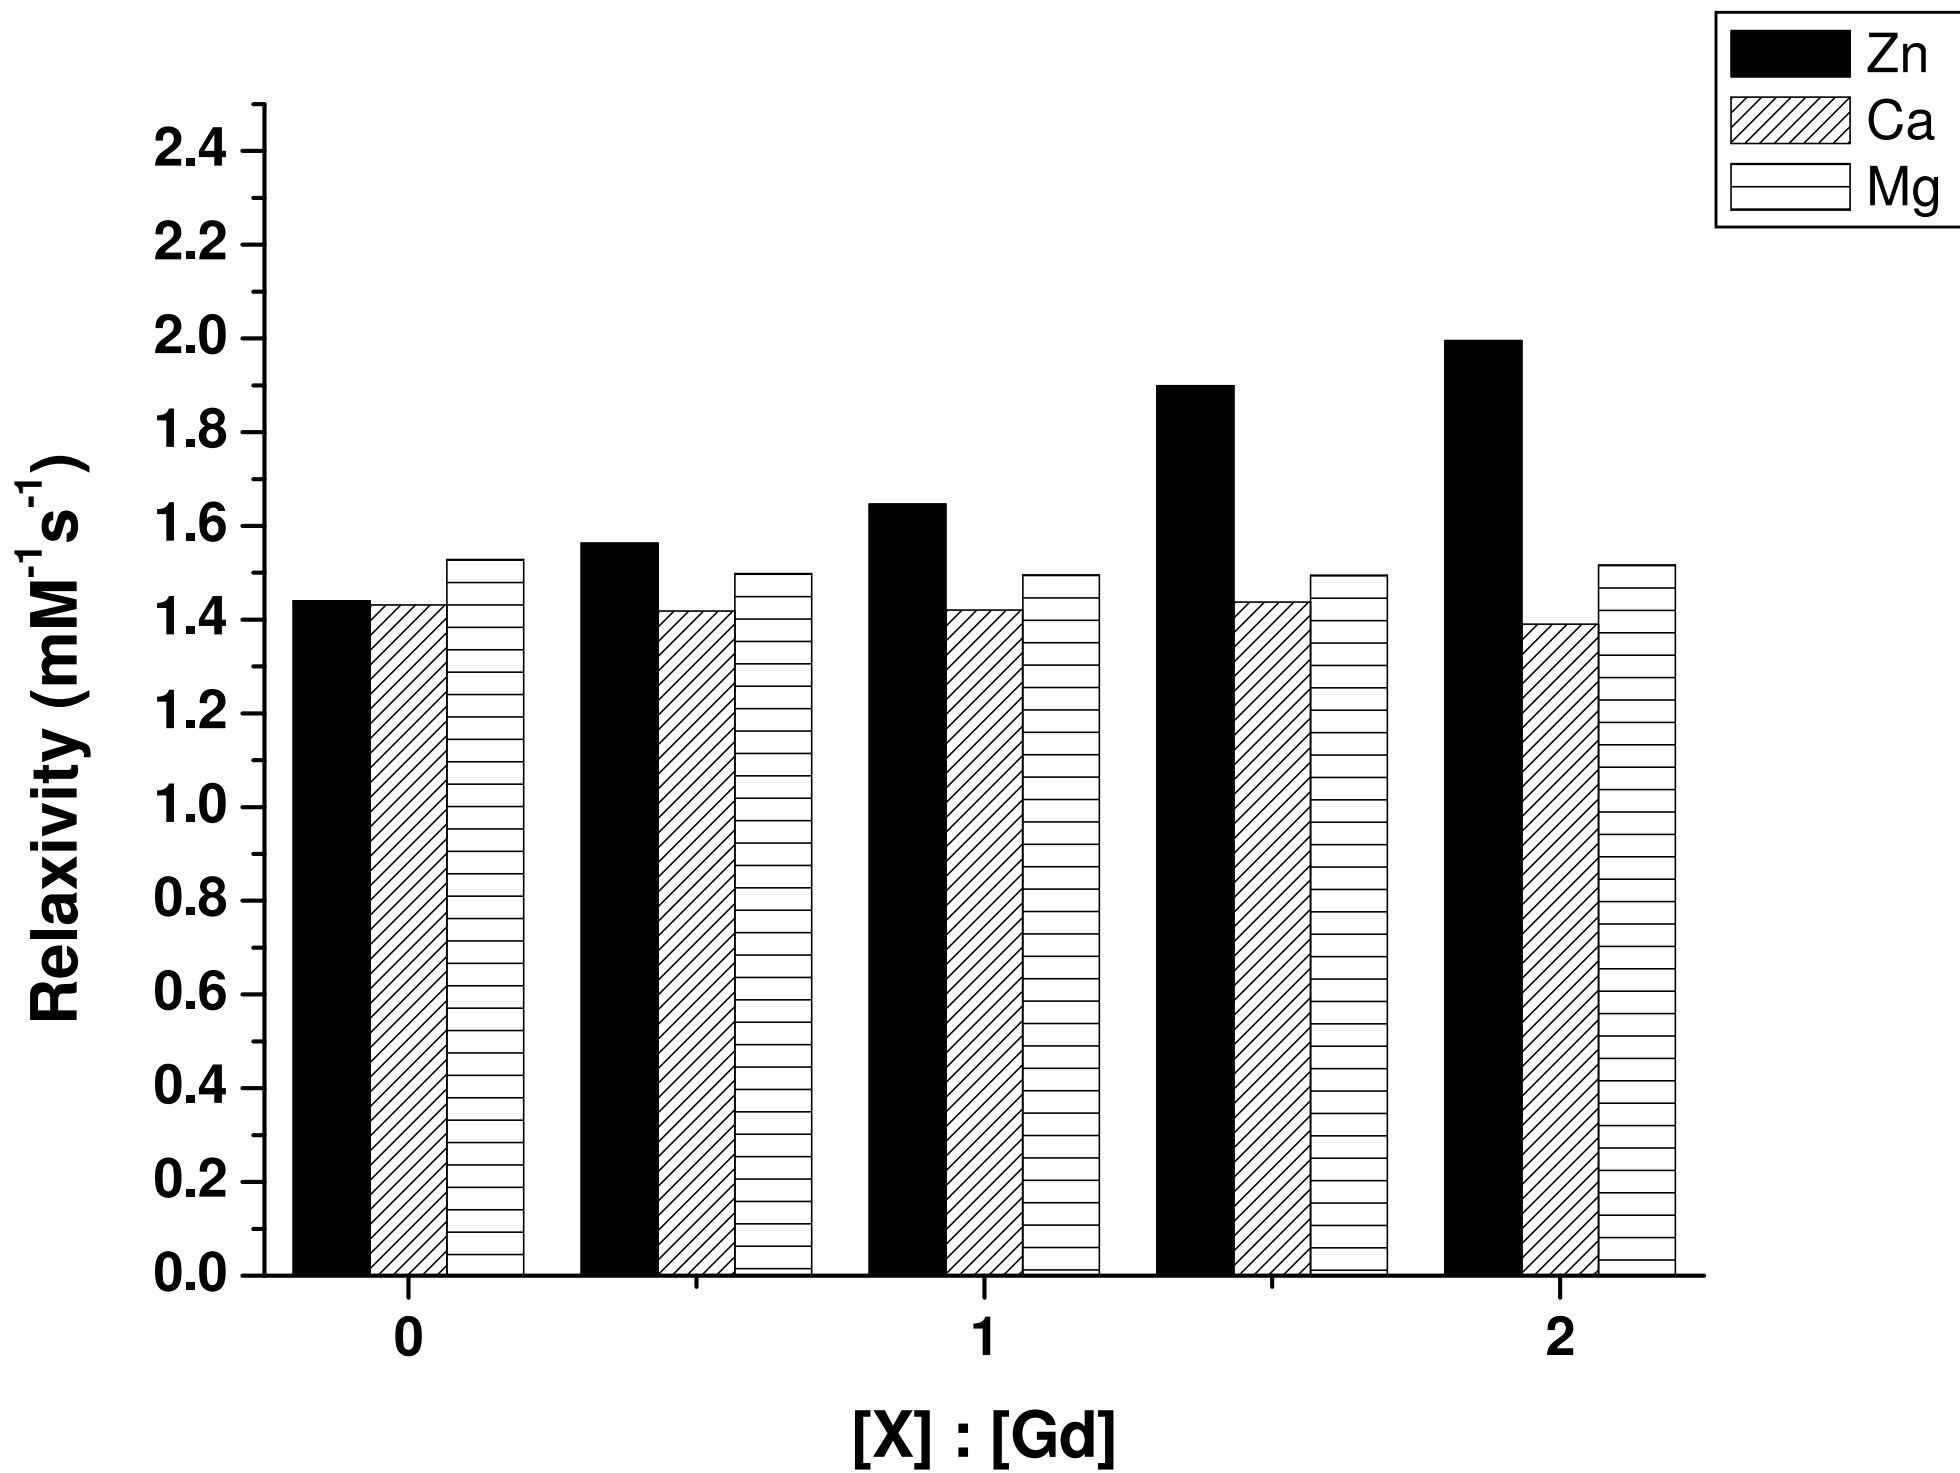

Supplement: pnas_0706247104_2.pdf [file pnas_0706247104_2.pdf]

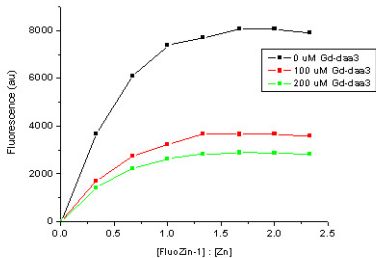

Supplement: pnas_0706247104_3.pdf [file pnas_0706247104_3.pdf]
